# Supplementary material
Source: Springer Nature journal article supplement (https://www.springermedizin.de/resource/supplementary/12348_2012_39_MOESM1_ESM.pdf/9673316)
Supplement: MOESM1 [file 9673316]

Supplemental Table 1. Inclusion and Exclusion Criteria

| <b>I. Inclusion Criteria</b>                                                                                                                                                                                                                                                                                                                                                                                                                                                                                                                                                                                                                                                                                                                                                                                                                                                                                                                                                                                                                                                                                                                                                                                     |                                                                                                                                                                                                                                                                                                                                                                                                                                                                                                                                                                                                                                                                                                                                                                                                                                                                                                                                                                                                                                                                                                                                                                                                                                                                                                                                                                                                |
|------------------------------------------------------------------------------------------------------------------------------------------------------------------------------------------------------------------------------------------------------------------------------------------------------------------------------------------------------------------------------------------------------------------------------------------------------------------------------------------------------------------------------------------------------------------------------------------------------------------------------------------------------------------------------------------------------------------------------------------------------------------------------------------------------------------------------------------------------------------------------------------------------------------------------------------------------------------------------------------------------------------------------------------------------------------------------------------------------------------------------------------------------------------------------------------------------------------|------------------------------------------------------------------------------------------------------------------------------------------------------------------------------------------------------------------------------------------------------------------------------------------------------------------------------------------------------------------------------------------------------------------------------------------------------------------------------------------------------------------------------------------------------------------------------------------------------------------------------------------------------------------------------------------------------------------------------------------------------------------------------------------------------------------------------------------------------------------------------------------------------------------------------------------------------------------------------------------------------------------------------------------------------------------------------------------------------------------------------------------------------------------------------------------------------------------------------------------------------------------------------------------------------------------------------------------------------------------------------------------------|
| <ol style="list-style-type: none"> <li>1. ≥18 years of age</li> <li>2. Have diagnosis of uveitis determined by the Investigator to be non-infectious based on the patient’s medical history, history of present illness, ocular examination, review of systems, physical examination, and any relevant, pertinent laboratory evaluations</li> <li>3. Patients with active uveitis, defined as having at least 1+ Vitreous Haze and/or at least 1+ Vitreous Cell Count (SUN scale), and</li> <li>4. are receiving no other treatment; or</li> <li>5. are receiving prednisone ≥10 mg/day and/or at least 1 other systemic immunosuppressant</li> <li>6. Patients with inactive disease, defined as having 0.5+ Vitreous Haze or less and a grade of 0.5+ Vitreous Cell Count or less (SUN scale), and are receiving prednisone &lt;10 mg/day and/or at least 1 other systemic immunosuppressant</li> <li>7. Have posterior, intermediate, or panuveitis; for panuveitis, if an anterior component is present, it must be less than the posterior component</li> <li>8. Sufficient inflammation to require systemic treatment</li> <li>9. Best-corrected visual acuity of 20/400 or better in both eyes</li> </ol> |                                                                                                                                                                                                                                                                                                                                                                                                                                                                                                                                                                                                                                                                                                                                                                                                                                                                                                                                                                                                                                                                                                                                                                                                                                                                                                                                                                                                |
| <b>Exclusion Criteria</b>                                                                                                                                                                                                                                                                                                                                                                                                                                                                                                                                                                                                                                                                                                                                                                                                                                                                                                                                                                                                                                                                                                                                                                                        |                                                                                                                                                                                                                                                                                                                                                                                                                                                                                                                                                                                                                                                                                                                                                                                                                                                                                                                                                                                                                                                                                                                                                                                                                                                                                                                                                                                                |
| <b>II. Non-Ocular</b>                                                                                                                                                                                                                                                                                                                                                                                                                                                                                                                                                                                                                                                                                                                                                                                                                                                                                                                                                                                                                                                                                                                                                                                            | <b>III. Ocular</b>                                                                                                                                                                                                                                                                                                                                                                                                                                                                                                                                                                                                                                                                                                                                                                                                                                                                                                                                                                                                                                                                                                                                                                                                                                                                                                                                                                             |
| <ol style="list-style-type: none"> <li>1. Allergy or hypersensitivity to sirolimus or fluorescein dye</li> <li>2. Immunosuppressive therapy within 30 days of Day 0</li> <li>3. Patients who are receiving strong inducers of CYP3A4 and P-gp Any recent infection within 30 days of Baseline</li> <li>4. Immunocompromised patients</li> <li>5. History of CMV infection or clinical evidence of active CMV infection at Baseline</li> <li>6. Malignancy in remission for less than 5 years prior to study</li> <li>7. History of other disease, metabolic dysfunction, physical examination finding, or clinical laboratory finding giving reasonable suspicion of a disease condition that contraindicates the use of an investigational drug, might affect the interpretation of the results of the study, or renders the patient at high risk for treatment complications;</li> <li>8. Females who are pregnant or lactating and females of child-bearing potential who are not using adequate contraceptive precautions</li> <li>9. Sexually active males with partners of child-bearing potential who are not using adequate contraceptive precautions</li> </ol>                                         | <ol style="list-style-type: none"> <li>1. Patients with bilateral uveitis who are receiving systemic immunomodulatory therapy for the treatment of the fellow eye and cannot be controlled with standard local therapies alone</li> <li>2. Any significant ocular disease that could compromise vision in the study eye</li> <li>3. Any intravitreal injections or posterior subtenon’s steroids within 90 days prior to Day 0</li> <li>4. Intraocular surgery within 90 days prior to Day 0</li> <li>5. Capsulotomy within 30 days prior to Day 0</li> <li>6. History of vitreoretinal surgery or scleral buckling within 90 days prior to Day 0</li> <li>7. Any ocular surgery anticipated within the first 180 days following Day 0</li> <li>8. Intraocular pressure ≥25 mmHg (glaucoma patients maintained on no more than 2 topical medications with IOP &lt;25 mmHg are allowed)</li> <li>9. Pupillary dilation inadequate for quality stereoscopic fundus photography</li> <li>10. Media opacity that would limit clinical visualization, intravenous fluorescein angiography (IVFA), or OCT evaluation</li> <li>11. Presence of any form of ocular malignancy</li> <li>12. History of herpetic infection in the study eye or adnexa</li> <li>13. Presence of known active or inactive toxoplasmosis in either eye</li> <li>14. Ocular or periocular infection in either eye</li> </ol> |
